# Supplementary material for: Development and evaluation of a suite of isotope reference gases for methane in air
Source: Copernicus journal article supplement (doi:10.5194/amt-2016-15), 2016-01-20
Supplement: Supplementary file [file amt-2016-15-AC3-supplement.pdf]

## Author's Comments to the reviewers

First of all, we would like to thank both reviewers and the author of the additional comment for their insightful and constructive critiques. As suggested by both reviewers, we have considerably re-written and re-structured large parts of the manuscript. Therefore, page and line numbers of the specific comments by the reviewers will not match the numbers in the revised manuscript. The revised manuscript considers every point mentioned by the reviewers and the comment, unless specifically addressed otherwise. We dedicated specific emphasis on the following aspects:

1) In the introduction, we present a review on the history of produced scale anchors at a range of laboratories analysing  $\delta^{13}\text{C-CH}_4$  and  $\delta^2\text{H-CH}_4$ . This list provides a good overview on the magnitude of potential inter-laboratory offsets and their variability over time. 2) We present a dedicated method section of the analytical setup that has been developed at MPI-BGC to analyse  $\delta^{13}\text{C-CH}_4$  and  $\delta^2\text{H-CH}_4$  in air samples. 3) We present a dedicated method section on the origin/development of the scale anchors at IMAU and MPI-BGC. 4) We have improved and clarified the applied terminology. For example we define the use of “calibration” in comparison to “measurement”, we refer to the produced gas mixtures as synthetic  $\text{CH}_4$ -in-air standards and to the pure  $\text{CH}_4$  gases as primary and secondary  $\text{CH}_4$  gases. “Working standard” is abbreviated WS, “certified reference material” CRM, “reference material” RM and “matrix reference material” (e.g.  $\text{CH}_4$  in air) as m-RM, complying with recommendations from IAEA TecDoc 1350. 5) We revised the calculation of the uncertainties and dedicated a separate method section to present our calculation method. All data presented in the manuscript include the uncertainties of the full traceability chain where possible (CRM → WS → primary  $\text{CH}_4$  → secondary  $\text{CH}_4$ ). The presented uncertainties include the most recent development in CRM's, i.e. the new uncertainty for LSVEC. 6) We revised the comparison between MPI-BGC and the previously published data/method of Sperlich et al., (2012). This includes a revision of the Sperlich et al., (2012) data and their uncertainties to include the full traceability chain. Moreover, we present new comparison experiments between the two methods of MPI-BGC and Sperlich et al., (2012) to discuss/support the methods presented in this manuscript. 7) The experiments to evaluate the potential for analytical errors of the new methods are explained and discussed in the main text in more detail, full details are provided in the Appendix.

Our response to the reviewers comments is indicated in blue in the following.

## Comment 1 (Sergey Assonov)

Stable isotope measurements of greenhouse gases CO<sub>2</sub> and CH<sub>4</sub> make a powerful tool used to understand processes involved in the global carbon cycle. In order to get meaningful interpretation of stable isotope data in greenhouse gases, the data produced in different labs and in different years should be compatible within certain limits (WMO, 2014), these are called as compatibility goals (Table 1). In the last years compatibility of air-CO<sub>2</sub> stable isotope data is thought to be improved by introducing calibration “JRAS air” mixtures (WMO, 2012).

The compatibility goals for CH<sub>4</sub> are still a challenge to be achieved; it can be realized by using optimised calibration schemes, and to be based on appropriate reference materials with low uncertainty. All in all the compatibility goals can be considered in the first instance as the uncertainty required for “fit-for purpose” reference materials. In turn, such reference materials have to be compatible with a sample, that is why the community needs several reference CH<sub>4</sub>-in-air mixtures.

| <b>Table 1.</b> Compatibility goals for atmospheric CH <sub>4</sub> (after WMO, 2014). <b>Component</b> | <b>Compatibility goal (for background air)</b> | <b>Extended compatibility goal (for polluted air)</b> |
|---------------------------------------------------------------------------------------------------------|------------------------------------------------|-------------------------------------------------------|
| $\delta^{13}\text{C-CH}_4$                                                                              | $\pm 0.02\text{‰}$                             | $\pm 0.2\text{‰}$                                     |
| $\delta^2\text{H-CH}_4$                                                                                 | $\pm 1\text{‰}$                                | $\pm 5\text{‰}$                                       |

Thereafter, work on the calibration of pure CH<sub>4</sub> gases aimed to produce reference CH<sub>4</sub>-mixtures cannot be published without thoughtful considerations of the uncertainty estimation and without clear presentation of the uncertainty budget. In particular this is expected for the work presented by the WMO-GAW Central Calibration Lab for stable isotopes in greenhouse gases (currently MPI-BGC, Jena, DE). In this respect the manuscript demonstrates serious problems such as unclear presentation of the calibrating approach in general, unclear uncertainty budget, as well as potentially missing/neglecting some uncertainty components. The major shortcuts are as following:

1. In order to build a skeleton of the uncertainty propagation, one has to consider a traceability chain for all measurements. The traceability chain has to be tracked to the highest Ref. Materials (RMs) in use. In case of  $\delta^{13}\text{C}$  these are NBS19 & LSVEC (these have to be considered with their uncertainties) and include all measurement steps. Each next measurement step (including measurements on RMs) introduces an analytical uncertainty, thus increasing the total uncertainty.

OK, that is included in Section 2.4 of the revised manuscript. Please keep in mind that per definition, NBS 19 has no uncertainty, as did LSVEC until just before the first version of the manuscript was submitted. The revised manuscript includes the calculation of the full traceability chain. In that, we calculated two uncertainties, with and without the new uncertainty of LSVEC.

2. The uncertainty propagation should be based on the traceability chain and also include all potential effects due to TC/EA, gas dilution etc. Besides, I would suggest to present the uncertainty budget, namely to describe a contribution of each uncertainty component starting from the uncertainty assigned to RMs carbonates (NBS19 and LSVEC), then the uncertainty of carbonate measurements, the uncertainty of 2-point calibration as based on the carbonates, then analytical uncertainty of “master”-CH<sub>4</sub> (this is used for calibration “calibration”CH<sub>4</sub>) etc. Such uncertainty budget will clearly demonstrate where further improvements are essential.

OK, see above comment. The uncertainty budget is revised and includes the uncertainties of all hierarchy levels. We explain in detail what systematic errors we suspected and how we were able to exclude them.

3. The “master” CH<sub>4</sub> (and its replacement when the first “master” was lost) was calibrated vs the IAEA Ref. Materials by applying the 2-point calibration approach. Next, several “calibration” CH<sub>4</sub> were calibrated vs the “master” CH<sub>4</sub>. It is unclear how the 2-point calibration was applied in the case of measuring several “calibration” CH<sub>4</sub> gases? In fact calibration vs. the “master” CH<sub>4</sub> looks like 1-point, thus violating the 2-point calibration approach (Coplen et al., 2006) designed to address various effects during sample preparation and measurements. I stress – this is in particular critical for  $\delta^{13}\text{C}$  values being down to -69.9 ‰ (Tab 3 in the manuscript), far below -40 ‰ of the “master”CH<sub>4</sub> and also outside the LSVEC value of -46.6 ‰.

OK, the revised manuscript considers this point in detail. We mention when scale compression corrections have been applied and present a comparison of isotopic differences between two very different gases as determined with each of the different methods. The agreement in scale resolution between the applied method is excellent. We also address the need for the replacement of LSVEC to extend to  $\delta^{13}\text{C}$  range found in biogenic CH<sub>4</sub> in order to tackle this problem in future.

4. Given that “calibration” CH<sub>4</sub> gases were characterised against the “master” CH<sub>4</sub>, it is unclear why the  $\delta^{13}\text{C}$ -uncertainty of 0.06 ‰ for Martha-1 (“calibration”-CH<sub>4</sub>) is smaller than the uncertainty of 0.07 ‰ obtained for the “master” CH<sub>4</sub>. The uncertainty of each next material cannot be smaller than the uncertainty of material(s) used for its calibration (in this case uncertainty of “master” CH<sub>4</sub>). This example implies something to be wrong in the uncertainty evaluation scheme in general. For the same reasons the  $\delta^{13}\text{C}$  uncertainty of  $\pm$  0.08 ‰ given for the “calibration” CH<sub>4</sub> Mike-1 looks like optimistically too low.

OK, the uncertainty calculations are revised (and version checked).

5. The authors should also explain the uncertainty values for “Biogenic” and “Fossil” CH<sub>4</sub>, namely the values of  $\pm$  0.04‰, as given with the reference to (Sperlich et al., 2012). Why these are lower than uncertainties obtained by the work presented in this manuscript? In fact Sperlich et al. (2012) gave no detailed explanation on the uncertainty propagation. Given that the paper by Sperlich et al. (2012) is written by the same authors as the present manuscript, this is a must-requirement.

OK, we discuss the uncertainty of Sperlich et al., (2012) and revise the uncertainty estimate to include the full traceability chain.

6. When focusing high accuracy values, the authors need to consider the effect  $^{17}\text{O}$  correction for the entire  $\delta^{13}\text{C}$ -calibration scheme, namely when calibration started from carbonates is applied to  $\text{CH}_4$  gases. Is there any potential bias?

OK,  $^{17}\text{O}$  correction and impact on  $\text{CH}_4$  and carbonate analyses is addressed.

7. Last but not least, the authors wrongly cite the  $\delta^{13}\text{C}$ -uncertainty of LSVEC. The message sent in Dec-2016 by the IAEA to LSVEC customers suggests the  $\delta^{13}\text{C}$ -uncertainty of LSVEC at  $\pm 0.15$  ‰; this value is also used by A. Schimmelmann et al. 2016 (see <http://pubs.acs.org/doi/abs/10.1021/acs.analchem.5b04392>). The present interpretation of the message distributed by the IAEA is misleading.

We adopted the uncertainty of 0.15 ‰ for LSVEC in the revised version of the manuscript.

All in all I find the uncertainty evaluation presented in the manuscript as unclear, confusing and partly misleading.

OK, this is re-visited in the new version of the manuscript.

The uncertainty evaluation for  $\delta^2\text{H}$  may suffer for similar reasons.

Speculation.

Given the problem with LSVEC, the  $\delta^{13}\text{C}$  uncertainty presently achieved appears not fulfilling the requirements.

OK, considered in revised manuscript.

Sergey ASSONOV (reference material specialist for stable isotopes)  
IAEA Environment Laboratories, IAEA
